# Supplementary material
Source: HighWire-hosted journal article supplement (https://bmjopen.bmj.com/content/13/8/e067706)
Supplement: inline-supplementary-material-3 [file inline-supplementary-material-3.pdf]

Supplementary appendix 3. Data extraction instrument

|        |                     |                |              |                                 |                                  |                                           |                                        |                       |                                              |                  |
|--------|---------------------|----------------|--------------|---------------------------------|----------------------------------|-------------------------------------------|----------------------------------------|-----------------------|----------------------------------------------|------------------|
| Author | Year of publication | Country/Region | Study object | Study method/design/sample size | General condition of the patient | Research context and data analysis method | Assessment tools to support care needs | Supportive care needs | Areas of the Supportive Care Needs Framework | Influence factor |
|--------|---------------------|----------------|--------------|---------------------------------|----------------------------------|-------------------------------------------|----------------------------------------|-----------------------|----------------------------------------------|------------------|
